# Supplementary material
Source: PubMed Central journal article supplement (PMC7344068)
Supplement: ajtr0012-2627-f7.pdf [file ajtr0012-2627-f7.pdf]

## mTOR inhibitor combined with NAC inhibits hepatic fibrosis

**Table S1.** Primer used for PCR

| Target gene     | Forward primer        | Reverse primer       | Product size (bp) |
|-----------------|-----------------------|----------------------|-------------------|
| $\alpha$ -SMA   | TGTGCTGGACTCTGGAGATG  | GATCACCTGCCCATCAGG   | 292               |
| Collagen type I | TTCCCTGGACCTAAGGGTACT | TTGAGCTCCAGCTTCGCC   | 113               |
| MMP-2           | CCCATACTTTACTCGGACCA  | TGACCTTGACCAGAACACCA | 420               |
| MMP-9           | AAATGTGGGTGTACACAGGC  | TTCACCCGGTTGTGGAACT  | 309               |
| MMP-13          | CCCTCGAACACTCAAATGGT  | GAGCTGCTTGCCAGGTTTC  | 312               |
| TIMP-1          | GGTTCCCTGGCATAATCTGA  | GTCATCGAGACCCCAAGGTA | 246               |
| GAPDH           | CCATCACCATCTTCCAGGAG  | GCATGGACTGTGGTCATGAG | 322               |

Abbreviation  $\alpha$ -SMA: alpha-smooth muscle actin, GAPDH: Glyceraldehyde 3-phosphate dehydrogenase, MMP: matrix metalloproteinase, TIMP: tissue inhibitor metalloproteinase.

**Table S2.** List of antibodies indicating the dilution for each use

| Antibody              | Company, Cat NO.                 | Dilution |
|-----------------------|----------------------------------|----------|
| Phospho-Akt           | Cell signaling, #9271            | 1:1000   |
| Akt                   | Cell signaling, #9272            | 1:1000   |
| Phospho-p70 S6 Kinase | Cell signaling, #9205            | 1:1000   |
| p70S6 Kinase          | Cell signaling, #9202            | 1:1000   |
| Collagen alpha1       | LifeSpan BioScience, #LS-C150353 | 1:1000   |
| $\beta$ -actin        | Santa Cruz, #sc-47778            | 1:1000   |

mTOR inhibitor combined with NAC inhibits hepatic fibrosis

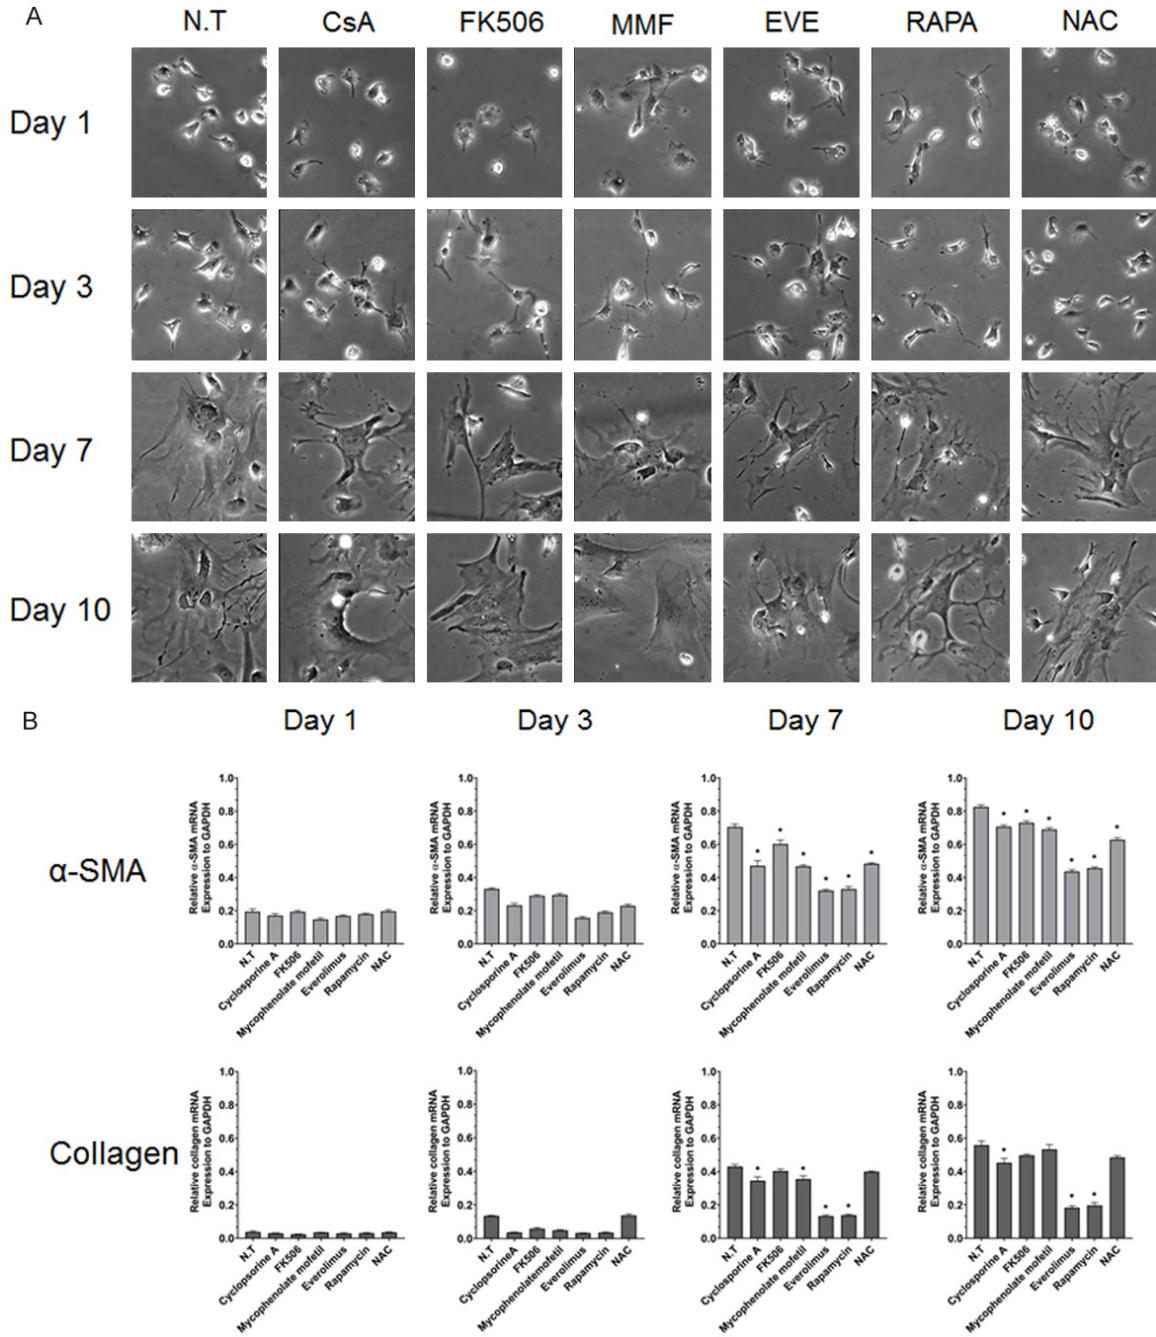

**Figure S1.** The effect of various immunosuppressive drugs on the activation of hepatic stellate cells. A. Morphological observation of drug-treated HSCs. HSCs increased in size and exhibited a myofibroblast-like phenotype. Morphological observation conducted at 200 times magnification. B. HSCs were treated with immunosuppressants and antioxidants for 10 d and mRNA expression of hepatic fibrosis-related genes was analyzed by RT-PCR. The mRNA level of each gene was normalized to that of glyceraldehyde 3-phosphate dehydrogenase. Values are shown as mean  $\pm$  SEM. \*P < 0.05 vs. non-treatment group.

mTOR inhibitor combined with NAC inhibits hepatic fibrosis

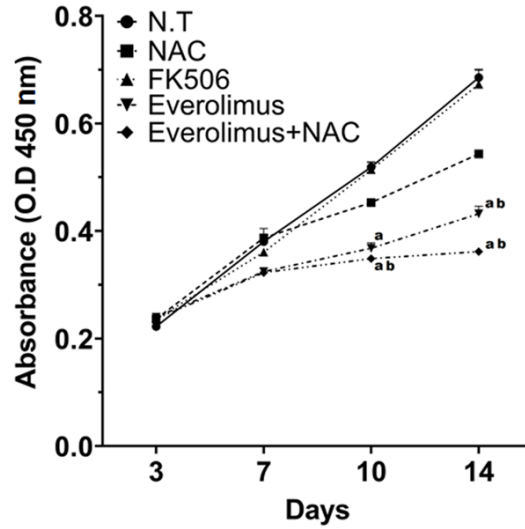

**Figure S2.** Treatment with everolimus and NAC inhibits the growth of HSCs. The effect of combination treatment on HSC viability was evaluated by a cell counting (CCK-8) assay. The cells were exposed to NAC, FK506, EVE, or EVE+NAC for 14 d. Data are represented as the mean  $\pm$  SEM of three independent experiments. <sup>a</sup>indicates  $P < 0.05$  vs. non-treatment group, <sup>b</sup>indicates  $P < 0.05$  for NAC treatment group vs. EVE+NAC treatment group at the same time point.

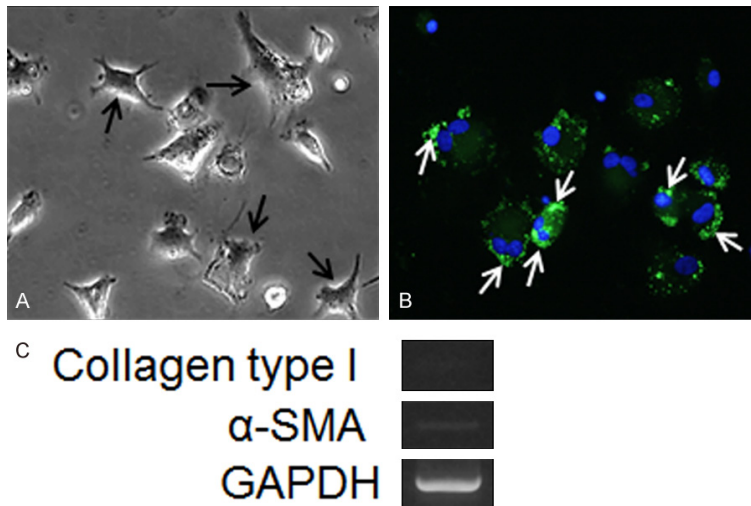

**Figure S3.** A. Phase-contrast image of rat HSCs in culture. Arrows (black) indicate cell bodies. Star-like morphology was observed. B. Quiescent HSCs exhibiting lipid droplets within the HSCs. HSCs incubated with BODIPY to stain the lipid vesicles green. Arrows (white) indicate lipid vesicles. C. In quiescent HSCs, fibrogenesis genes are downregulated. Morphological observation conducted at 200 times magnification.
